# Supplementary material
Source: PubMed Central journal article supplement (PMC5207268)
Supplement: 10.1074_M116.742742_jbc.M116.742742-1.pdf [file 10.1074_M116.742742_jbc.M116.742742-1.pdf]

**Jafari et al. Supplementary Figures S1-S3**

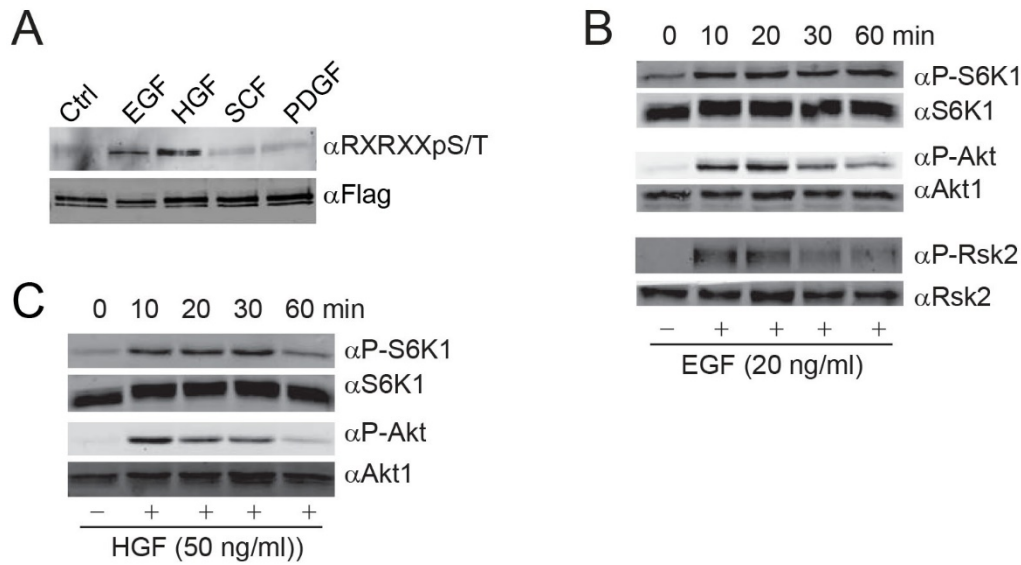

**Supplementary Fig. S1. HGF and EGF stimulate PIPKI90 phosphorylation.** **A.** MDA-MB-468 cells that stably express Flag-PIPKI $\gamma$ 90 were serum-starved and stimulated with EGF (20 ng/ml), HGF (50ng/ml), SCF (20 ng/ml) and PDGF (20 ng/ml) for 20 min, respectively. Flag-PIPKI $\gamma$ 90 was immunoprecipitated and the phosphorylation was detected with an anti-RXXRXXpS/T motif antibody. **B.** Time-course of Akt, S6K1 and Rsk2 activation in EGF-stimulated MDA-MB-231 cells. **C.** Time-course of Akt and S6K1 activation in HGF-stimulated MDA-MB-231 cells.

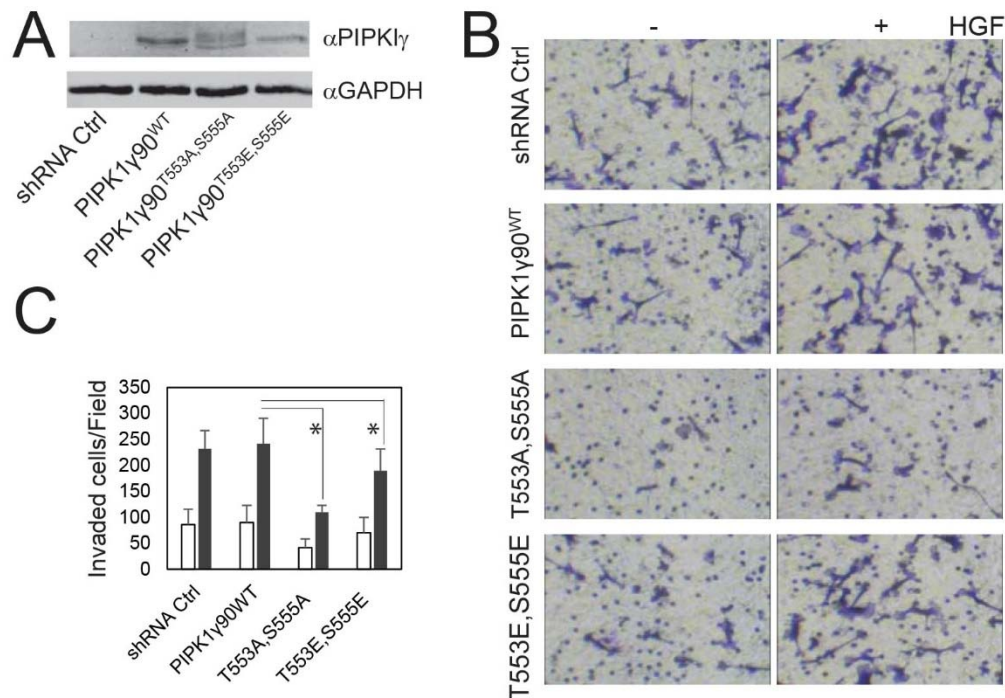

**Supplementary Fig. S2. Overexpression of PIPKI $\gamma$ 90<sup>T553A,S555A</sup> in MDA-MB-231 cells suppressed cell invasion.** **A.** Expression of ZZ-PIPKI $\gamma$ , -PIPKI $\gamma$ <sup>T553A,S555A</sup>, or -PIPKI $\gamma$ <sup>T553E,S555E</sup> in parental MDA-

MB-231 cells. MDA-MB-231 cells were infected with retroviruses that express ZZ-PIP1 $\gamma$ 90, -PIP1 $\gamma$ 90<sup>T553A,S555A</sup>, or PIP1 $\gamma$ 90<sup>T553E,S555E</sup>, and then selected with neomycin. **B.** MDA-MB-231 cells that express ZZ-PIP1 $\gamma$ 90, ZZ-PIP1 $\gamma$ 90<sup>T553A,S555A</sup>, and ZZ-PIP1 $\gamma$ 90<sup>T553E,S555E</sup>, respectively, were examined for their Matrigel invasive activities in the absence and presence of HGF. **C.** Quantification of Experiment "B". White bar, without HGF, grey bar, 20 ng/ml HGF. Data are presented as mean $\pm$ SEM, n=3. \*P<0.05.

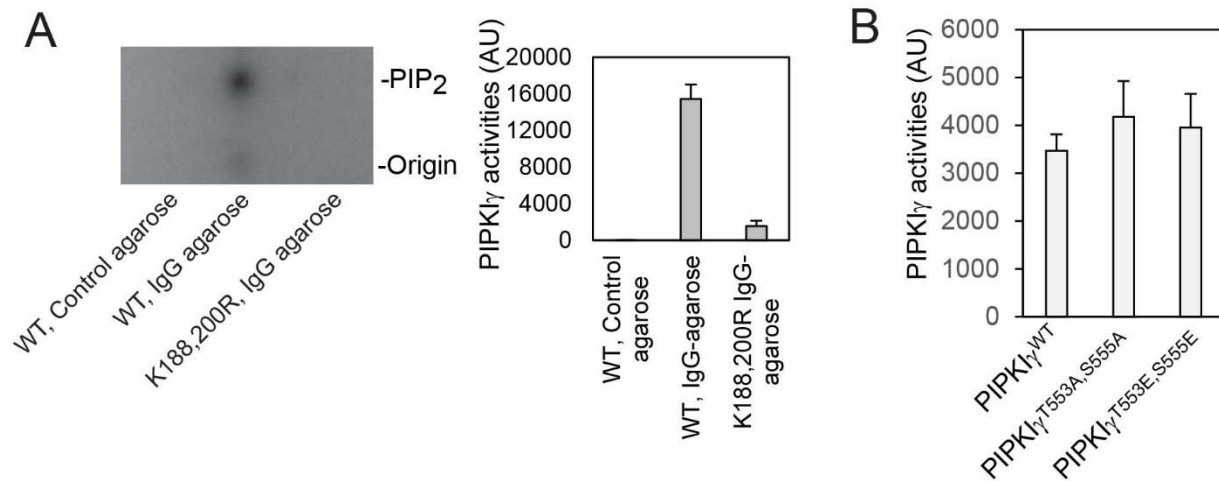

**Supplementary Fig. S3. Mutation at T553 and S555 did not affect PIP1 $\gamma$  activity in vitro.**

**A.** ZZ-PIP1 $\gamma$ 90<sup>WT</sup> and ZZ-PIP1 $\gamma$ 90<sup>K188,200R</sup> were transfected into CHO-K1 cells, respectively, and immunoprecipitated with IgG-conjugated-agarose beads or protein A agarose. The activities of PIP1 $\gamma$  and the mutants were determined using PI(4)P and [ $\gamma$ -<sup>32</sup>P]ATP as substrates. **B.** ZZ-PIP1 $\gamma$ , -PIP1 $\gamma$ <sup>T553A,S555A</sup>, and -PIP1 $\gamma$ <sup>T553E,S555E</sup> were immunoprecipitated using IgG-Agarose beads from CHO-K1 cells. The activities of PIP1 $\gamma$ 90 and mutants were determined as described above.
